# Supplementary material for: Preliminary Studies on Immune Response and Viral Pathogenesis of Zika Virus in Rhesus Macaques
Source: Pathogens. 2018 Aug 20;7(3):70. doi: 10.3390/pathogens7030070 (PMC6160936; doi:10.3390/pathogens7030070)
Supplement: Supplementary file 1 [file pathogens-07-00070-s001.pdf]

# Supplementary Table I: ZIKV-positive tissues by ddPCR and RNAScope

(ZIKV positive tissues were confirmed by detecting viral RNA with ddPCR and RNAScope ZIKV-specific chromogenic probes).

| Sample<br>(Necropsy date) | Intravaginal (IVAG) infection |          |                    |          | Subcutaneous (sub Q) infection |          |                    |          |                     |          |
|---------------------------|-------------------------------|----------|--------------------|----------|--------------------------------|----------|--------------------|----------|---------------------|----------|
|                           | RFc15R<br>(110 dpi)           |          | R1811R<br>(60 dpi) |          | A12T006<br>(8 dpi)             |          | RZi15R<br>(21 dpi) |          | R21612R<br>(21 dpi) |          |
|                           | PCR                           | RNAScope | PCR                | RNAScope | PCR                            | RNAScope | PCR                | RNAScope | PCR                 | RNAScope |
| Lung                      | -                             | ND       | -                  | -        | -                              | -        | -                  | ND       | -                   | ND       |
| Spleen                    | -                             | ND       | -                  | -        | -                              | -        | +                  | ND       | +                   | ND       |
| Liver                     | -                             | ND       | -                  | -        | -                              | -        | -                  | ND       | -                   | ND       |
| Kidney                    | -                             | ND       | +                  | +        | -                              | -        | +                  | ND       | -                   | ND       |
| Intestine                 | -                             | ND       | -                  | -        | -                              | -        | +                  | ND       | -                   | ND       |
| Stomach                   | -                             | ND       | -                  | -        | -                              | -        | -                  | ND       | -                   | ND       |
| Heart                     | -                             | ND       | +                  | +        | +                              | +        | -                  | ND       | -                   | ND       |
| Vagina                    | ND                            | ND       | ND                 | ND       | +                              | +        | -                  | ND       | -                   | ND       |
| Uterus                    | -                             | ND       | -                  | -        | +                              | +        | -                  | ND       | -                   | ND       |
| Inguinal LN               | -                             | ND       | +                  | +        | -                              | -        | +                  | ND       | +                   | ND       |
| Axillary LN               | -                             | ND       | -                  | -        | -                              | -        | +                  | ND       | +                   | ND       |
| Colonic LN                | -                             | ND       | +                  | +        | -                              | -        | +                  | +        | +                   | ND       |
| Mesenteric LN             | -                             | ND       | -                  | -        | -                              | -        | +                  | ND       | -                   | ND       |
| Cervical LN               | -                             | ND       | +                  | +        | -                              | -        | -                  | ND       | -                   | ND       |
| Thoracic SC               | -                             | ND       | -                  | -        | -                              | -        | -                  | ND       | -                   | ND       |
| Cervical SC               | -                             | ND       | -                  | -        | -                              | -        | -                  | ND       | -                   | ND       |
| Lumbar SC                 | ND                            | ND       | ND                 | ND       | +                              | +        | -                  | ND       | -                   | ND       |
| Peripheral SC             | -                             | ND       | -                  | -        | -                              | -        | +                  | ND       | -                   | ND       |
| Retina                    | -                             | ND       | -                  | -        | -                              | -        | -                  | ND       | -                   | ND       |
| Subventricular zone       | -                             | ND       | -                  | -        | -                              | -        | -                  | ND       | -                   | ND       |
| Hippocampus               | -                             | ND       | +                  | +        | -                              | -        | -                  | ND       | -                   | ND       |
| Frontal lobe cortex       | -                             | ND       | -                  | -        | -                              | -        | -                  | ND       | +                   | ND       |
| Parietal lobe cortex      | -                             | ND       | -                  | -        | +                              | +        | -                  | ND       | -                   | ND       |
| Temporal lobe cortex      | -                             | ND       | -                  | -        | -                              | -        | -                  | ND       | -                   | ND       |
| Occipital lobe cortex     | -                             | ND       | -                  | -        | -                              | -        | -                  | ND       | -                   | ND       |
| Hypothalamus              | -                             | ND       | -                  | -        | +                              | +        | -                  | ND       | -                   | ND       |
| Cerebellum                | -                             | ND       | -                  | -        | -                              | -        | +                  | +        | -                   | ND       |
| Amygdala                  | -                             | ND       | -                  | -        | +                              | -        | -                  | ND       | -                   | ND       |
| Caudate nucleus           | -                             | ND       | +                  | -        | +                              | +        | -                  | ND       | +                   | ND       |

PCR: ddPCR, -: PCR amplification or RNAScope negative, +: PCR amplification or RNAScope positive

### MONOCYTE AND DENDRITIC CELL GATING STRATEGY

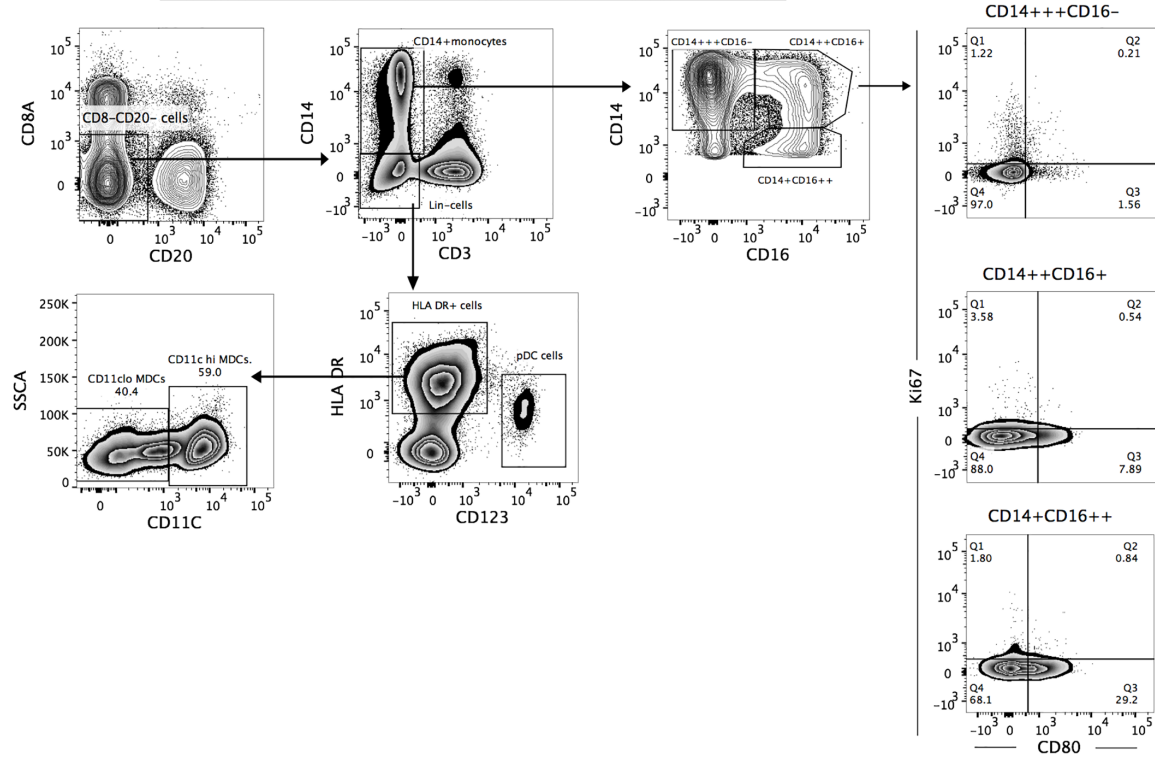

**Fig S1. Monocyte and dendritic cell gating strategy:** This involved the exclusion of B cells and NK (CD3-CD8 $\alpha$ +) cells from the CD3- population (CD8-CD20-). From the CD8-CD20- population, we gated out CD14+ cells, which were further discriminated into CD14+++CD16- (classical), CD14++CD16+ (intermediate) and CD14+CD16++ (non-classical) monocyte phenotypes. These diverse monocyte phenotypes were further evaluated for their expression of Ki67+ and CD80+ based on the placement of FMO gates. On the other hand, dendritic cells (DCs) were obtained from the Lin- (CD3-, CD8-, CD14- and CD20-) population. From the Lin- population, HLA DR+ cells were excluded and further divided into CD11C hi MDCs and CD11C lo MDCs. We focused on changes that occur in CD11C hi MDCs.

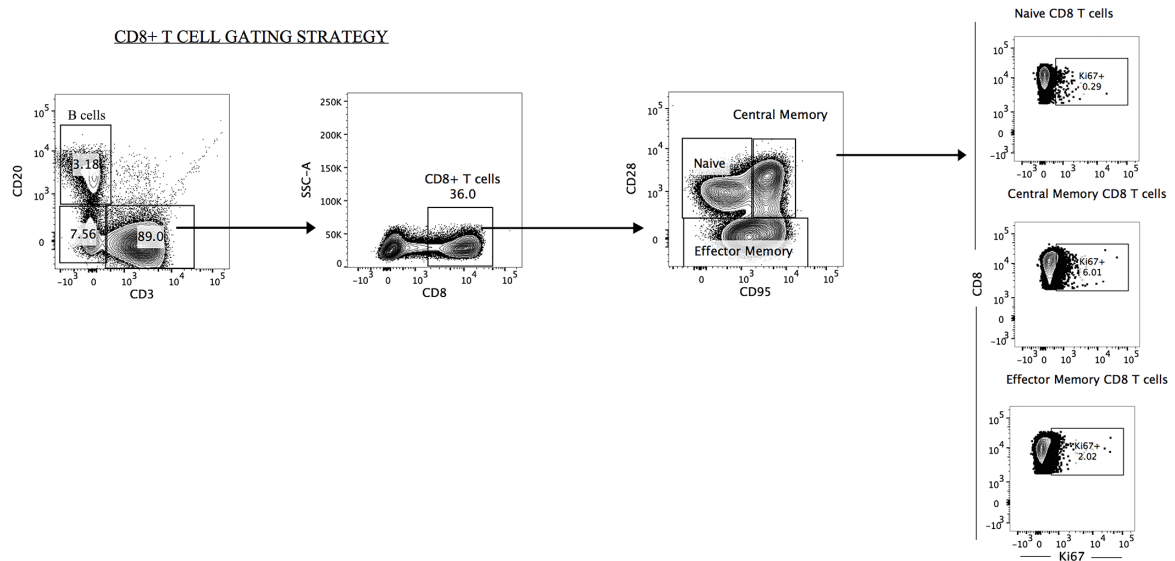

**Fig S2. B cell and CD8+ gating strategy.** Briefly, B cells were classified as CD3-CD20+ cells. Changes that occurred in these cell frequencies were studied across all experimental animals at diverse time points. From the CD3+ population, we delineated CD8+ T cells and categorized them into respective naive, central memory and effector memory phenotypes. We then focused on Ki67 expression on central memory CD8+ T cells following the placement of an appropriate Fluorescent Minus One (FMO) gate.

#### NK CELL GATING STRATEGY

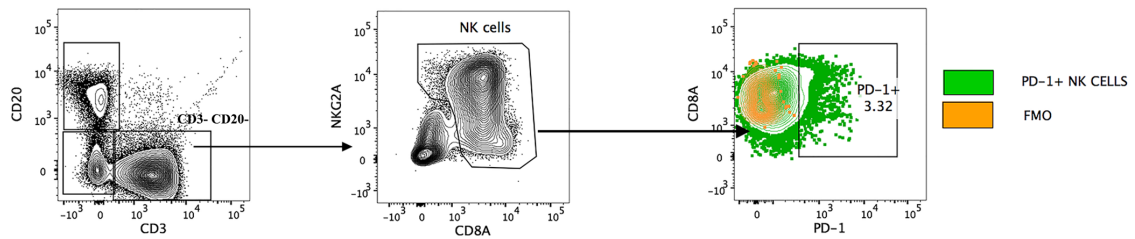

**Fig S3. Describing the NK cell gating strategy.** From the CD3- population, we obtained NK cells by CD8 $\alpha$  and NKG2A co-expression. Following the placement of a PD-1 FMO gate, we were able to study changes that occur in PD-1+ NK cells during the course of the study.
